# Supplementary material for: Nanosheet assembled microspheres of metal (Zn, Ni, and Cu) indium sulfides for highly selective CO2 electroreduction to methane
Source: Royal Society of Chemistry journal article supplement (doi:10.1039/d4cy00270a), 2024-01-01
Supplement: d4cy00270a1.pdf [file d4cy00270a1.pdf]

## Supporting Information

### **Nanosheet assembled microspheres metal (Zn, Ni, and Cu) indium sulfide for highly selective CO<sub>2</sub> electroreduction to methane**

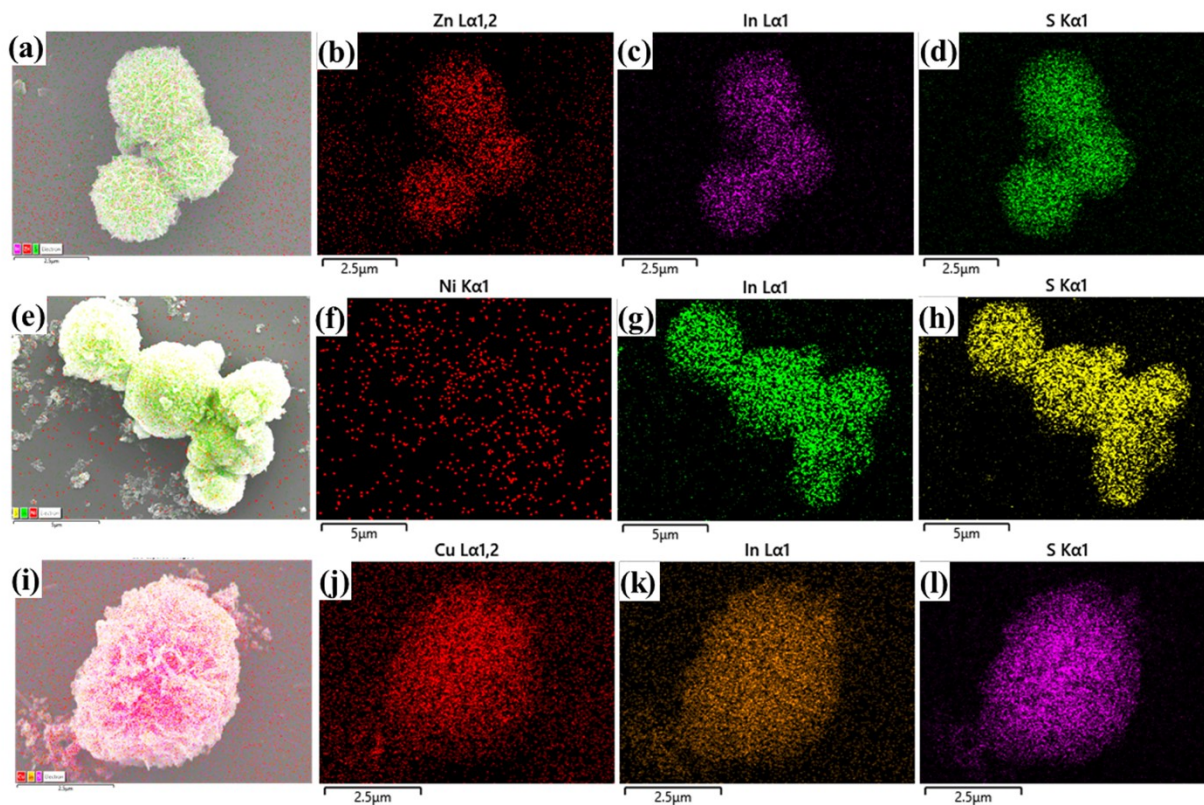

**Fig. S1.** FESEM elemental mapping of ZIS (a-d), NIS (e-h), and CIS (i-l).

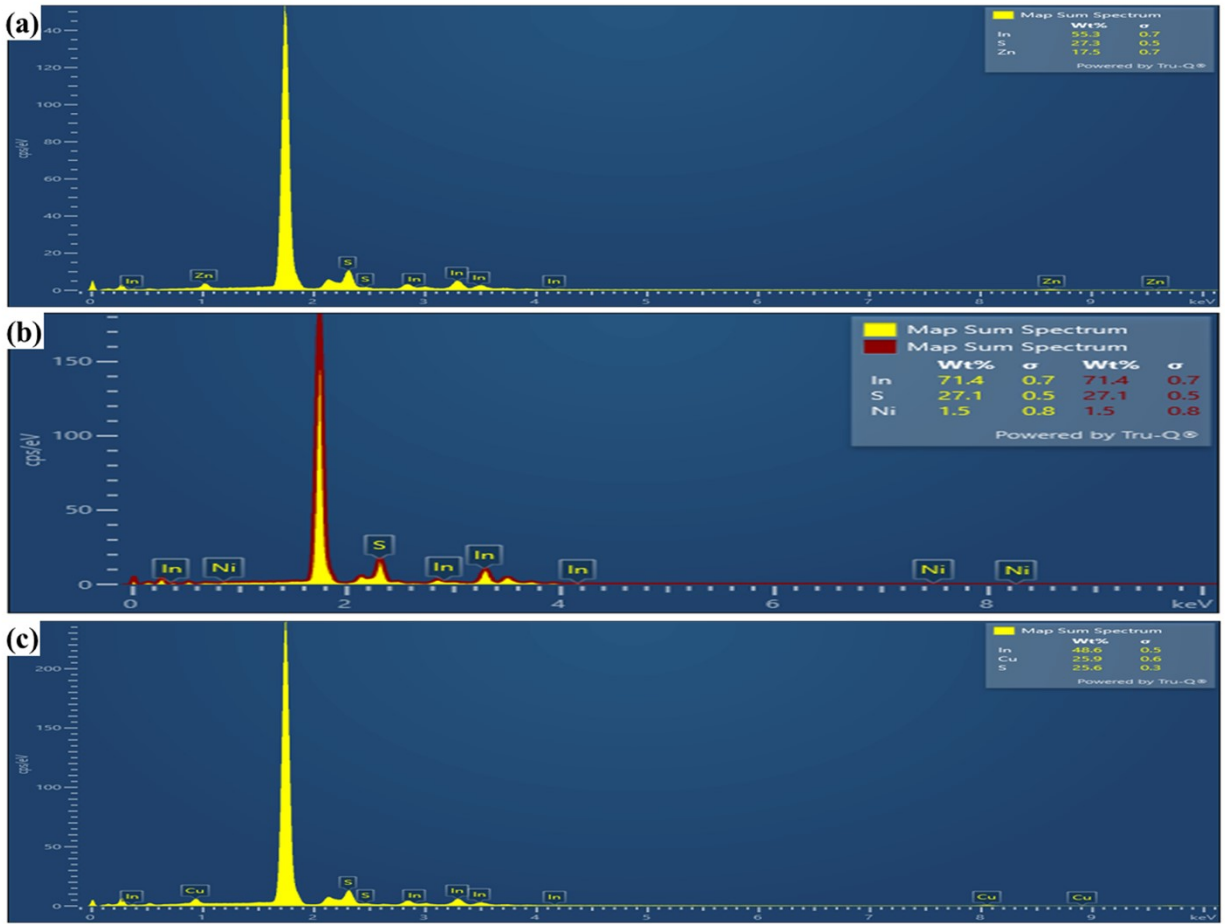

**Fig. S2.** EDS of samples. (a) ZIS, (b) NIS, and (c) CIS.

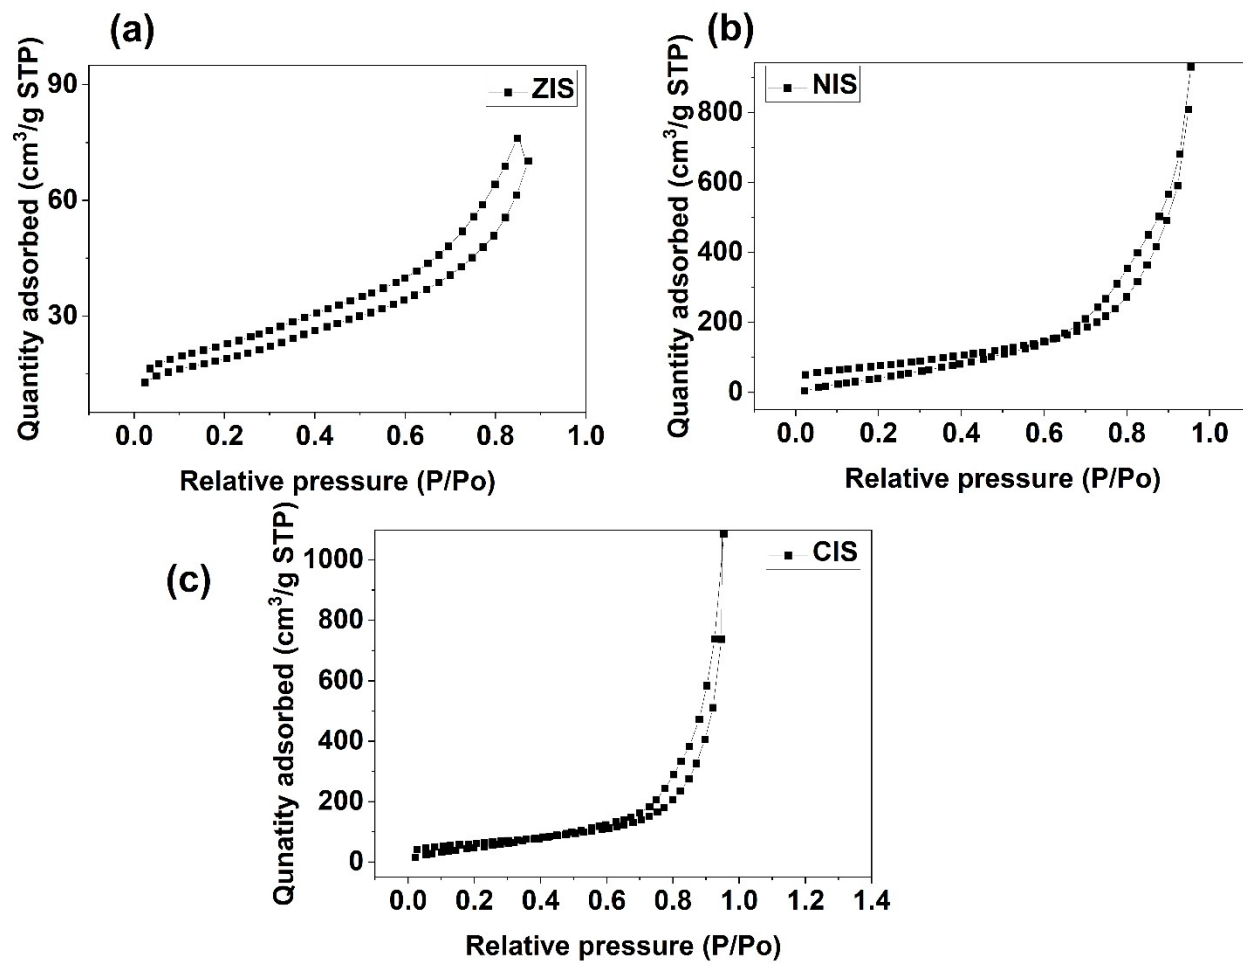

Fig. S3. BET surface area of samples. (a) ZIS, (b) NIS, and (c) CIS.

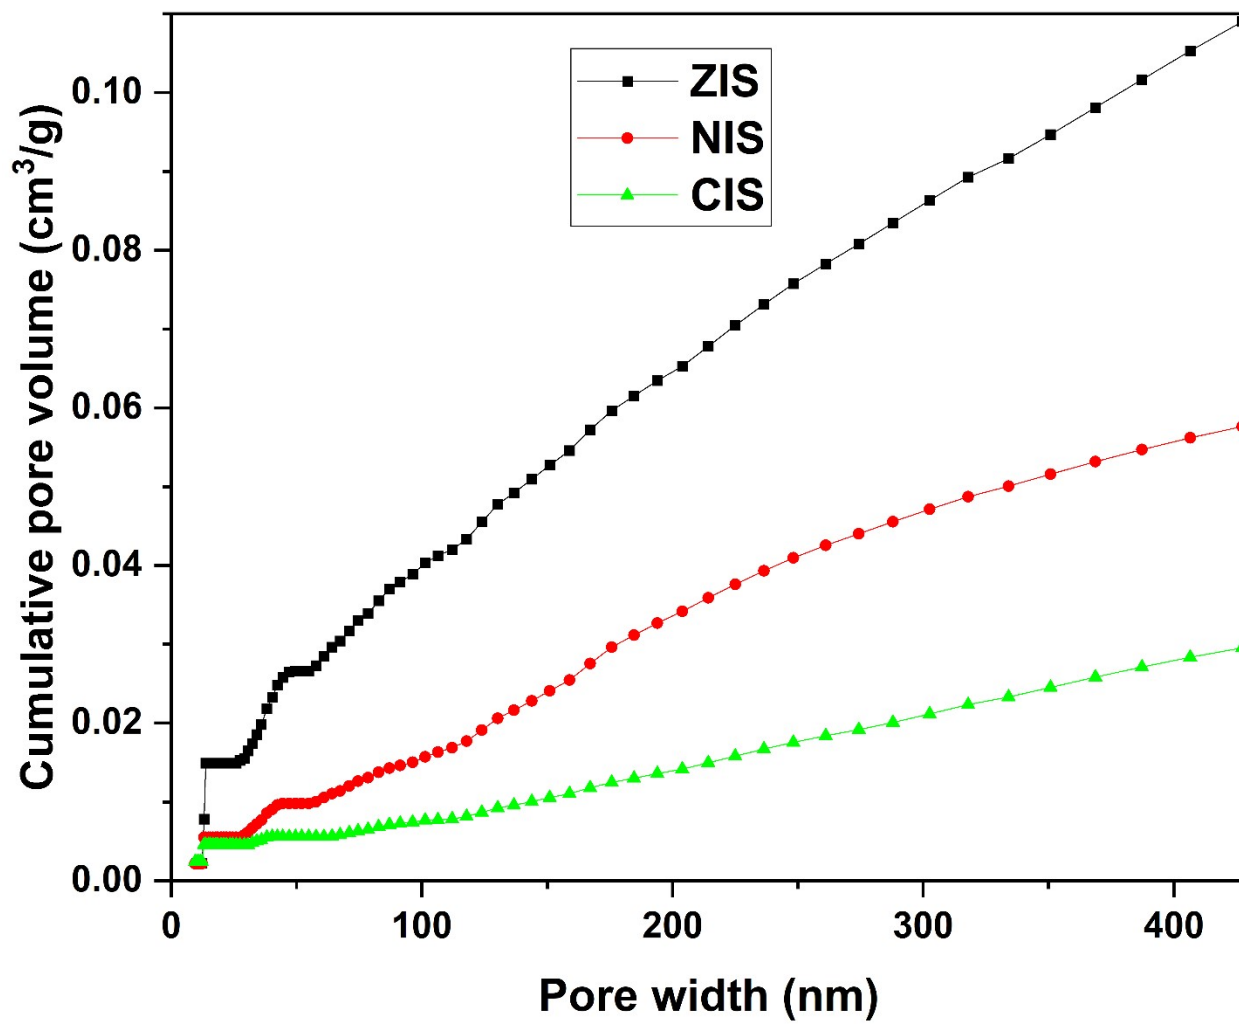

Fig. S4. Pore-size distribution of ZIS, NIS, and CIS.

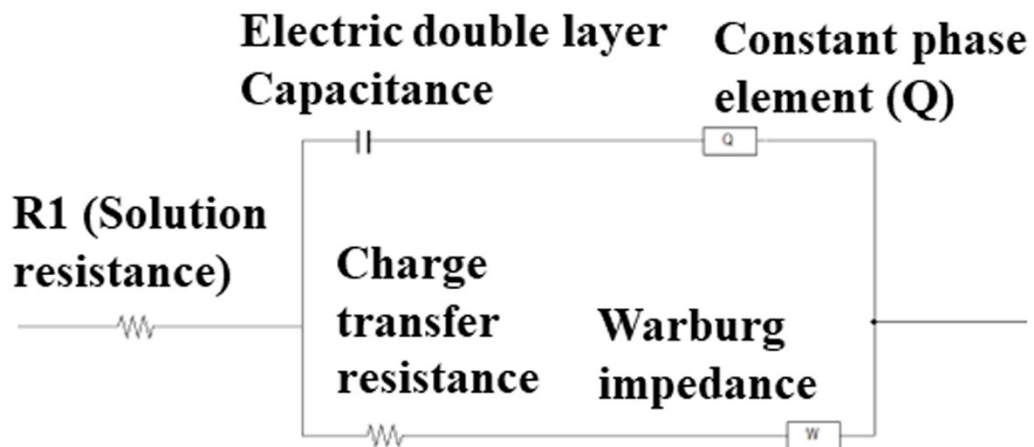

**Fig. S5.** Equivalent circuit of ZIS, NIS, and CIS.

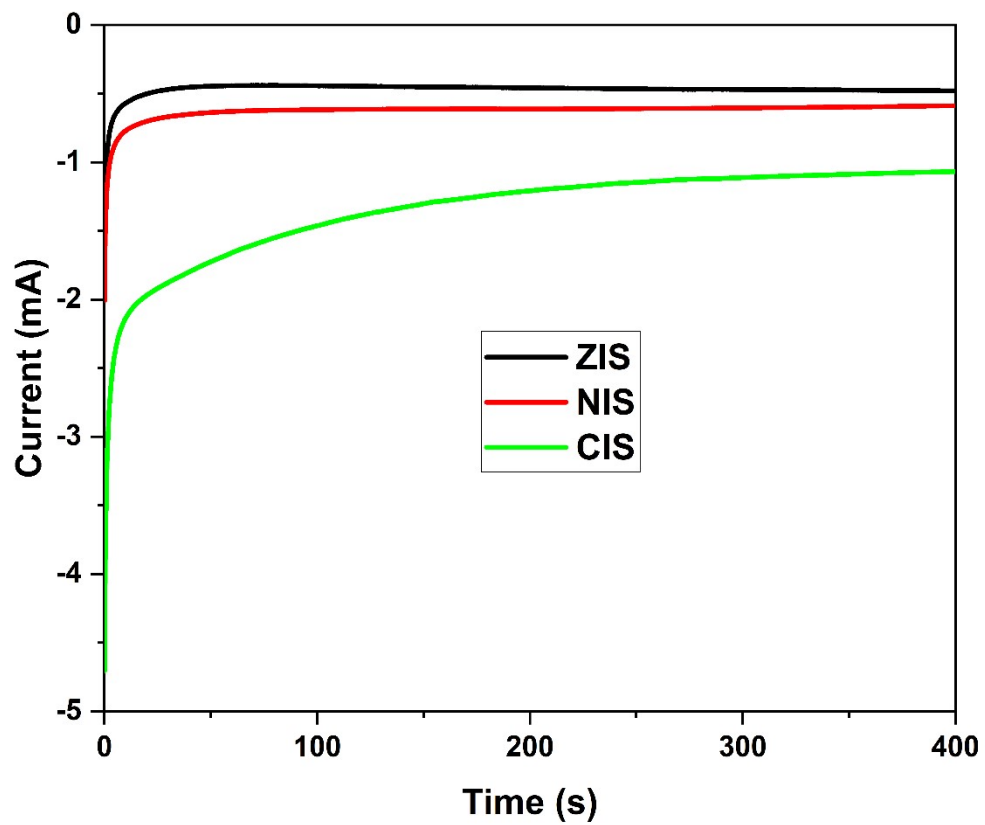

**Fig. S6.** Chronoamperometries curves of ZIS, NIS, and CIS.

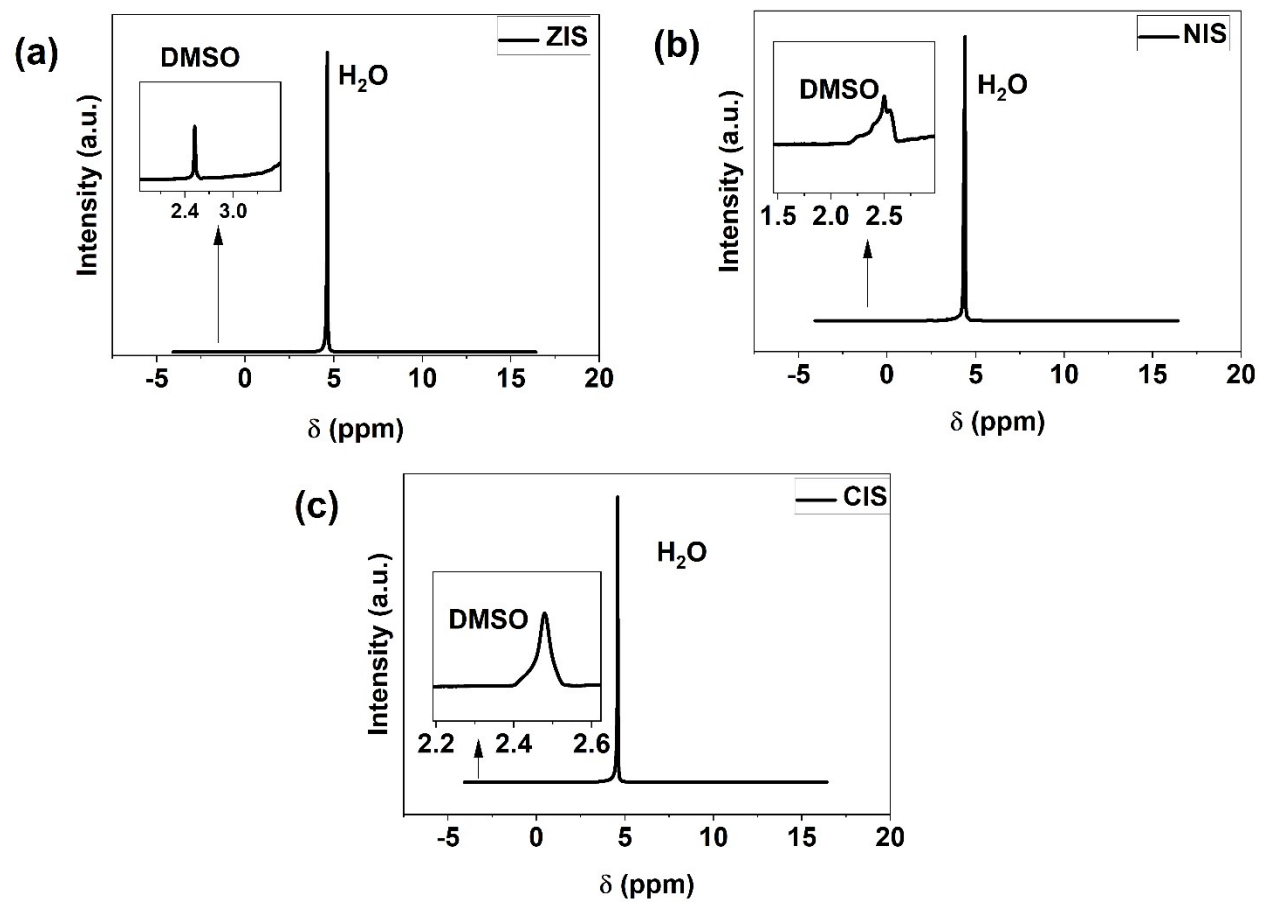

**Fig. S7.**  $^1\text{H}$  NMR graph of samples. (a) ZIS, (b) NIS, and (c) CIS.



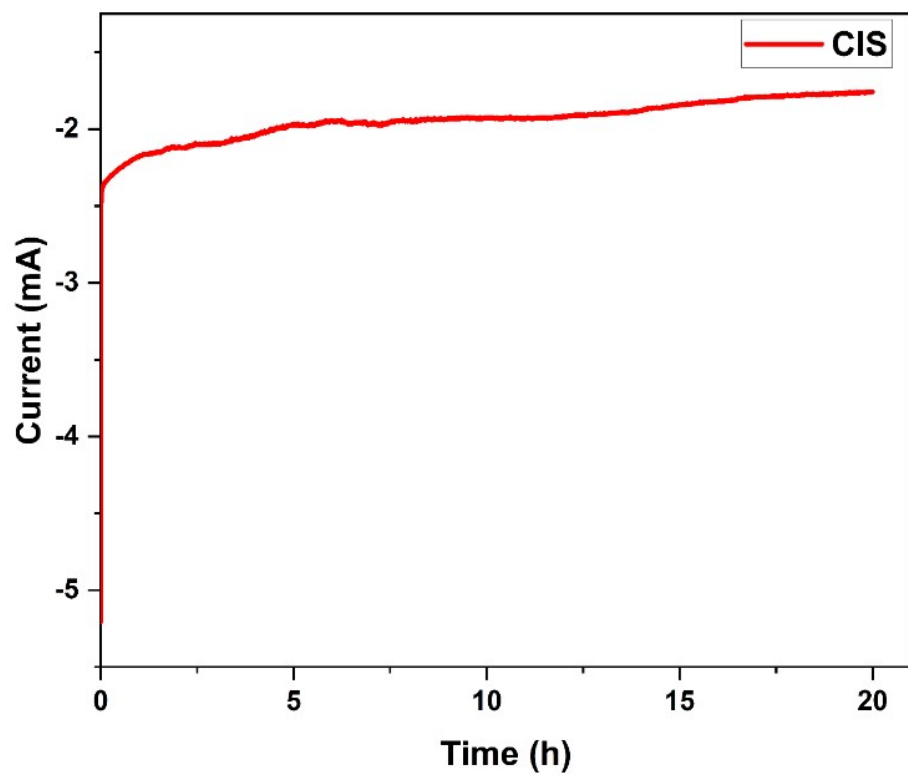

**Fig. S8.** Durability test of CIS for 20 h at -0.6 V vs RHE.

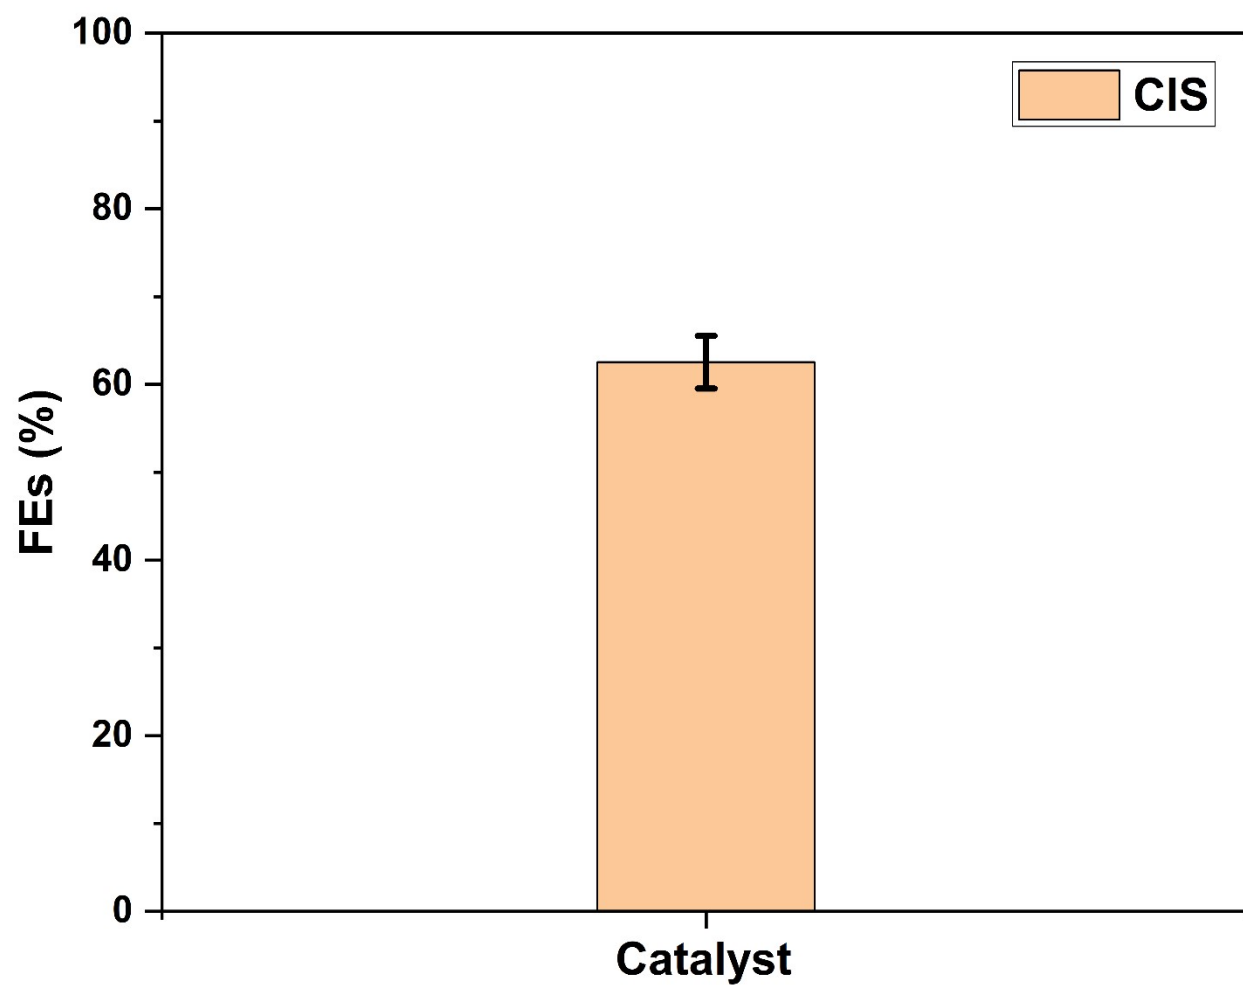

Fig. S9. FEs at -0.6 V versus RHE after durability test of CIS for 20 h at -0.6 V versus RHE.

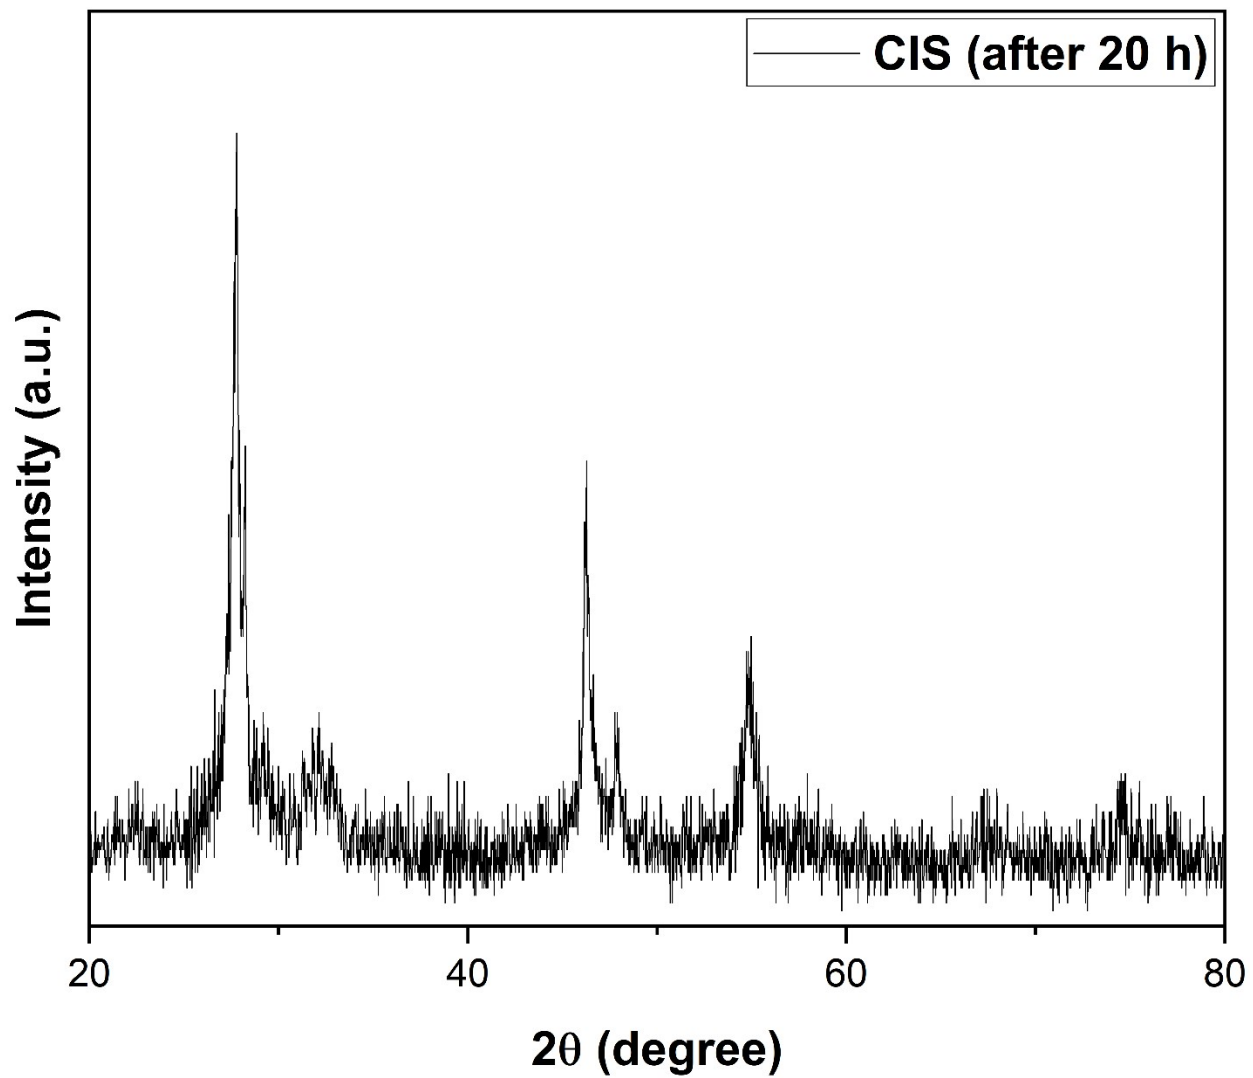

**Fig. S10.** XRD pattern of CIS after 20 h stability.

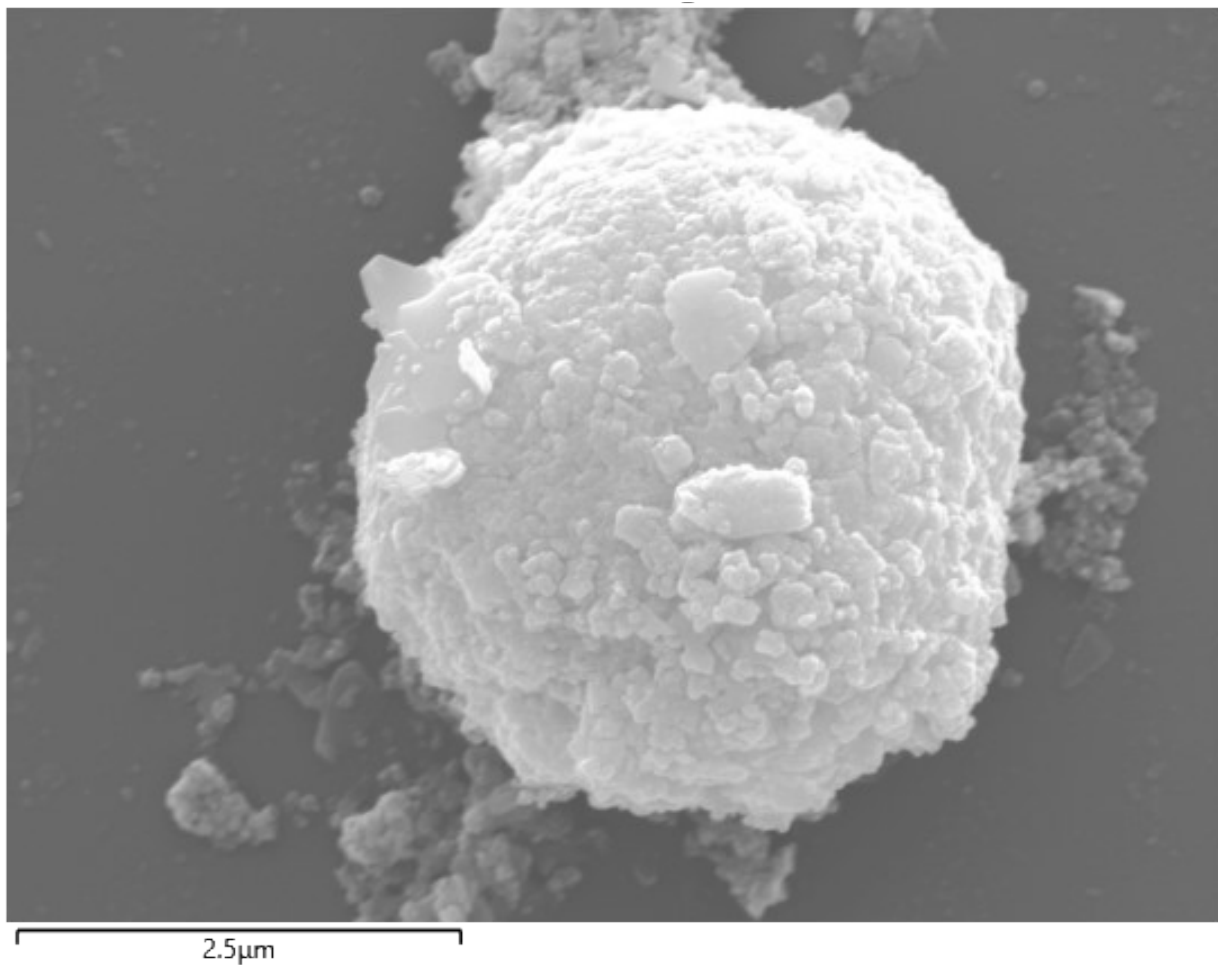

**Fig. S11.** FESEM image of CIS after 20 h stability.

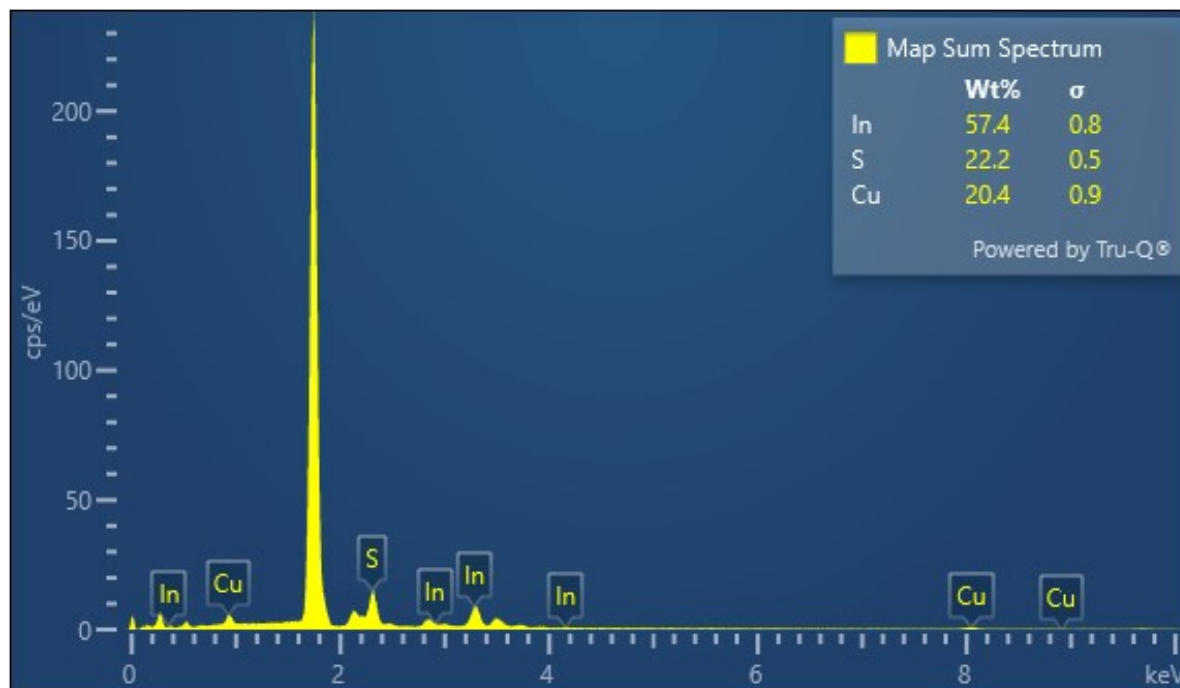

**Fig. S12.** EDS of CIS after 20 h stability.

**Table S1.** Equivalent series resistance values of ZIS, NIS, and CIS electrocatalysts obtained from the EIS analysis.

| <b>Samples</b> | <b>R1 (Solution resistance) <math>\Omega</math></b> | <b>Warburg impedance coefficient (<math>\sigma</math>)</b> | <b>R2 (Charge transfer resistance) <math>\Omega</math></b> | <b>Q (Constant phase element)</b> | <b>Electric double layer Capacitance (F)</b> |
|----------------|-----------------------------------------------------|------------------------------------------------------------|------------------------------------------------------------|-----------------------------------|----------------------------------------------|
| ZIS            | 37.41                                               | 0.00002704                                                 | 2347                                                       | 0.002847                          | 0.00003614                                   |
| NIS            | 35.64                                               | 0.000012                                                   | 2157                                                       | 0.003011                          | 0.00002851                                   |
| CIS            | 49.25                                               | 0.0007006                                                  | 1306                                                       | 0.002768                          | 0.00002831                                   |

**Table S2.** Data obtained from GC during the electrochemical reduction of CO<sub>2</sub> at -0.6 V (V vs. RHE) using ZIS, NIS, and CIS.

| <b>Samples</b> | <b>Concentration<br/>of CH<sub>4</sub> (ppm)</b> | <b>Current<br/>(mA)</b> | <b>FEs</b> |
|----------------|--------------------------------------------------|-------------------------|------------|
| ZIS (400 s)    | 89.79                                            | 0.455                   | 67.78      |
| NIS (400 s)    | 89.16                                            | 0.75                    | 75.31      |
| CIS (400 s)    | 124.72                                           | 1.69                    | 80.11      |
| CIS (20 h)     | 97.33                                            | 1.69                    | 62.53      |
